# Supplementary material for: Enhanced exopolysaccharide yield and antioxidant activities of Schizophyllum commune fermented products by the addition of Radix Puerariae
Source: Royal Society of Chemistry journal article supplement (doi:10.1039/d1ra06314f), 2021-01-01
Supplement: d1ra06314f1.pdf [file d1ra06314f1.pdf]

**Supporting Information**

**Enhanced exopolysaccharides yield and antioxidant  
activities of *Schizophyllum commune* fermented products by  
addition of Radix Puerariae**

Yongfei Deng <sup>a, b, c</sup>, Qian Huang <sup>c</sup>, Lu Hu <sup>b</sup>, Tao Liu <sup>a</sup>, Bisheng Zheng <sup>d</sup>, Dengjun Lu <sup>\*a</sup>,  
Chaowan Guo <sup>\*b</sup>, Lin Zhou <sup>\*c, b</sup>

**\* Corresponding Author**

E-mail: zhoulin@gdpu.edu.cn

E-mail: dj6688@126.com

E-mail: guo.chaowan@marubi.cn

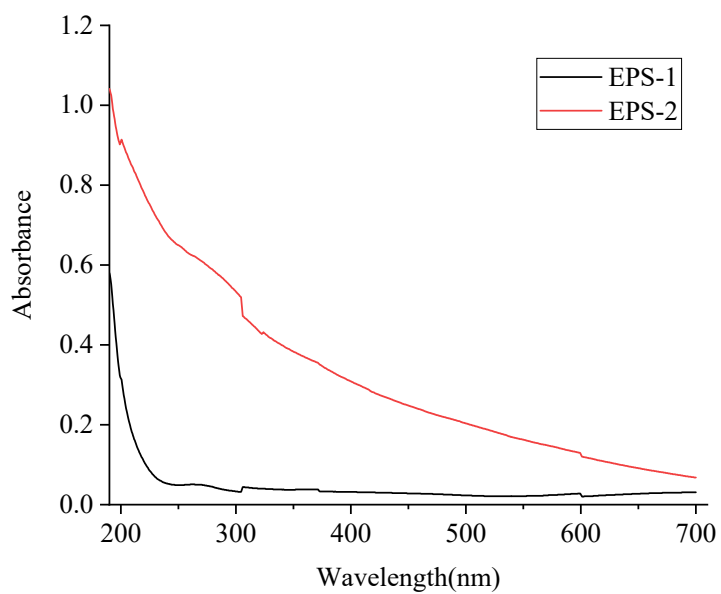

Fig.S1. UV spectrum of EPS-1 and EPS-2.

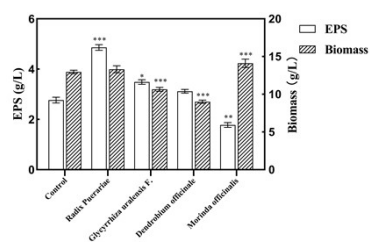

Fig.S2. Effect of Different Chinese Medicines on *Schizopyllum commune* EPS yield and Biomass

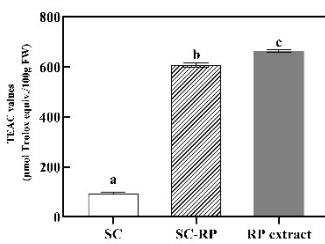

Fig.S3. ABTS radical scavenging activities of fermented supernatants cultured from RP-supplemented medium (SC-RP) or regular medium (SC) and RP extracts

**Table S1** *P*-value of Pearson correlation coefficient between bioactive ingredients in SC-RP and antioxidant activity

|                  | Total phenolics | Total flavonoids | SPG   | Total protein | Fenton system | TEAC values | FRAP values | ORAC values |
|------------------|-----------------|------------------|-------|---------------|---------------|-------------|-------------|-------------|
| Total phenolic   | 0.000           | 0.001            | 0.011 | 0.005         | 0.296         | 0.012**     | 0.035*      | 0.035*      |
| Total flavonoids |                 | 0.000            | 0.002 | 0.001         | 0.194         | 0.010**     | 0.066       | 0.029*      |
| SPG              |                 |                  | 0.000 | 0.000         | 0.106         | 0.026**     | 0.109       | 0.060       |
| Total protein    |                 |                  |       | 0.000         | 0.143         | 0.021**     | 0.088       | 0.050       |
| Fenton system    |                 |                  |       |               | 0.000         | 0.245       | 0.574       | 0.294       |
| TEAC values      |                 |                  |       |               |               | 0.000       | 0.061       | 0.010       |
| FRAP values      |                 |                  |       |               |               |             | 0.000       | 0.164       |
| ORAC values      |                 |                  |       |               |               |             |             | 0.000       |

a. \*Significant at  $0.01 < p < 0.05$ , \*\*significant at  $p < 0.01$ , \*\*\*significant at  $p < 0.001$
